# Supplementary material for: Reduction-induced facile isomerisation of metallacarboranes: synthesis and crystallographic characterisation of 4-Cp-4,1,2-closo-CoC2B9H11
Source: Royal Society of Chemistry journal article supplement (doi:10.1039/c5dt02506k), 2015-01-01
Supplement: c5dt02506k1.pdf [file c5dt02506k1.pdf]

## Reduction-induced facile isomerisation of metallocarboranes: synthesis and crystallographic characterisation of 4-Cp-4,1,2-closo-CoC<sub>2</sub>B<sub>9</sub>H<sub>11</sub>

Wing. Y. Man, Georgina M. Rosair and Alan J. Welch

### Electronic Supplementary Information

#### Crystal Data for CpCoC<sub>2</sub>B<sub>9</sub>H<sub>11</sub> Isomers

| Isomer | <i>a</i>    | <i>b</i>    | <i>c</i>    | β          | space group                         | <i>Z'</i> | ref.      |
|--------|-------------|-------------|-------------|------------|-------------------------------------|-----------|-----------|
| 3,1,2  | 15.8260(24) | 10.2226(22) | 7.4928(19)  |            | <i>P2<sub>1</sub>2<sub>1</sub>2</i> | 1         | 1         |
| 3,1,2  | 7.0693(2)   | 9.4904(3)   | 17.7697(4)  | 90.844(2)  | <i>P2<sub>1</sub>/c</i>             | 1         | 2         |
| 2,1,7  | 21.9632(19) | 13.8017(11) | 16.1380(14) | 98.213(4)  | <i>C2/c</i>                         | 2         | 3         |
| 2,1,7  | 12.4903(11) | 8.7207(7)   | 12.7392(12) | 116.123(4) | <i>P2<sub>1</sub>/n</i>             | 1         | 4         |
| 2,1,12 | 11.7649(19) | 13.141(2)   | 15.981(3)   | 100.311(5) | <i>P2<sub>1</sub>/c</i>             | 2         | 3         |
| 4,1,2  | 11.6409(12) | 6.6488(6)   | 16.1299(15) | 93.823(5)  | <i>P2<sub>1</sub>/c</i>             | 1         | this work |
| 2,1,8  | 7.5155(7)   | 13.3972(11) | 12.1302(10) | 101.333(4) | <i>P2<sub>1</sub>/n</i>             | 1         | 5         |
| 2,1,9  |             |             |             |            |                                     |           |           |
| 9,1,7  |             |             |             |            |                                     |           |           |
| 8,1,2  | 12.5686(6)  | 13.8720(7)  | 28.4382(14) |            | <i>Pbca</i>                         | 2         | 5         |
| 9,1,2  |             |             |             |            |                                     |           |           |

#### References

- 1 D. E. Smith and A. J. Welch, *Organometallics*, 1986, **5**, 760.
- 2 J. G. Planas, C. Viñas, F. Teixidor, M. E. Light and M. B. Hursthouse, *CrystEngComm*, 2007, **9**, 888.
- 3 M. E. López, D. Ellis, P. R. Murray, G. M. Rosair, A. J. Welch and L. J. Yellowlees, *Collect. Czech. Chem. Commun.*, 2010, **75**, 853.
- 4 W. Y. Man, G. M. Rosair and A. J. Welch, *Acta Cryst.*, 2015, **E71**, m141.
- 5 W. Y. Man, S. Zlatogorsky, H. Tricas, D. Ellis, G. M. Rosair and A. J. Welch, *Angew. Chem. Int. Ed.*, 2014, **53**, 12222.
